# Supplementary material
Source: PubMed Central journal article supplement (PMC7640763)
Supplement: NIHMS1622336-supplement-SM.pdf [file NIHMS1622336-supplement-SM.pdf]

## Supplemental Information

### Single-Cell Analyses Identify Brain Mural

### Cells Expressing CD19 as Potential

### Off-Tumor Targets for CAR-T Immunotherapies

Kevin R. Parker, Denis Migliorini, Eric Perkey, Kathryn E. Yost, Aparna Bhaduri, Puneet Bagga, Mohammad Haris, Neil E. Wilson, Fang Liu, Khatuna Gabunia, John Scholler, Thomas J. Montine, Vijay G. Bhoj, Ravinder Reddy, Suyash Mohan, Ivan Maillard, Arnold R. Kriegstein, Carl H. June, Howard Y. Chang, Avery D. Posey Jr., and Ansuman T. Satpathy

Table S1. Severe Neurological Events in Trials Investigating anti CD19 CAR-T Cells, Related to [Figure 7](#)

| PI       | Study Name   | Indication                                 | Center                | scFv   | Endo-domain s      | Neurologic events Grade > 3 | Fatal Neuro-toxicity | NCT                                                            | Status     |
|----------|--------------|--------------------------------------------|-----------------------|--------|--------------------|-----------------------------|----------------------|----------------------------------------------------------------|------------|
| Trede    | Rocket Trial | R/R or MRD+ CD19+ adult B cell ALL         | MSKCC                 | SJ25C1 | CD28-CD3- $\zeta$  | 42% (16/38)                 | 5                    | NCT02535364 (Juno Therapeutics, a Subsidiary of Celgene, 2020) | Terminated |
| Locke    | ZUMA1        | R/R NHL                                    | Moffitt Cancer Center | FMC63  | CD28-CD3- $\zeta$  | 57% (4/7)                   | 1                    | NCT02348216 (Locke et al., 2017)                               | completed  |
| Maloney  | -            | R/R CD19+ adult CLL                        | Fred Hutch            | FMC63  | 4-1BB-CD3- $\zeta$ | 25% (6/24)                  | 1                    | NCT01865617 (Turtle et al., 2017)                              | ongoing    |
| Maloney  | -            | R/R adult NHL                              | Fred Hutch            | FMC63  | 4-1BB-CD3- $\zeta$ | 28% (9/32)                  | 1                    | NCT01865617 (Turtle et al., 2016a)                             | ongoing    |
| Maloney  | -            | R/R adult B-ALL                            | Fred Hutch            | FMC63  | 4-1BB-CD3- $\zeta$ | 50%. (15/30)                | 1                    | NCT01865617 (Turtle et al., 2016b)                             | ongoing    |
| Schuster | -            | R/R adult DLBCL                            | Penn                  | FMC63  | 4-1BB-CD3- $\zeta$ | 11% (3/28)                  | 1                    | NCT02030834 (Schuster et al., 2017)                            | completed  |
| Maude    | CTL019       | Pediatric/young adult B cell ALL           | Penn                  | FMC63  | 4-1BB-CD3- $\zeta$ | 45% (23/51)                 | -                    | NCT01626495 (Gofshiteyn et al., 2018)<br>NCT01029366           | completed  |
| Maude    | ELIANA       | R/R CD19+ pediatric/young adult B cell ALL | Multi-center          | FMC63  | 4-1BB-CD3- $\zeta$ | 13% (10/75)                 | -                    | NCT02435849 (Maude et al., 2018)                               | completed  |
| Lee      | KTE-C19      | R/R CD19+ B cell ALL                       | NCI                   | FMC63  | CD28-CD3- $\zeta$  | 4% (1/21)                   | -                    | NCT01593696 (Lee et al., 2015)                                 | completed  |
| Neelapu  | ZUMA1        | R/R Adult DLBCL                            | Multi-center          | FMC63  | CD28-CD3- $\zeta$  | 28% (28/101)                | -                    | NCT02348216 (Neelapu et al., 2017)                             | completed  |
| Park     | -            | R/R CD19+ adult B cell ALL                 | MSKCC                 | FMC63  | CD28-CD3- $\zeta$  | 42% (22/53)                 | -                    | NCT01044069 (Park et al., 2018)                                | completed  |
| Gardner  | -            | R/R CD19+ ALL pediatric/young adult        | Seattle Children's    | FMC63  | 4-1BB-CD3- $\zeta$ | 21% (9/43)                  | -                    | NCT02028455 (Gardner et al., 2017)                             | completed  |

Nomenclature: B-ALL (B cell acute lymphoblastic leukemia), CLL (Chronic lymphocytic leukemia), DLBCL (Diffuse large B cell lymphoma), MRD (Minimal residual disease), NHL (Non-Hodgkin Lymphoma), R/R Relapsed/Refractory, scFv Single Chain Fragment Variable, PI (principal investigator).
